# Supplementary material for: Molecular Characterization, Expression Pattern and Function Analysis of Glycine-Rich Protein Genes Under Stresses in Chinese Cabbage (Brassica rapa L. ssp. pekinensis)
Source: Front Genet. 2020 Jul 23;11:774. doi: 10.3389/fgene.2020.00774 (PMC7396569; doi:10.3389/fgene.2020.00774)
Supplement: Supplementary file 1 [file Data_Sheet_1.xlsx]

## Sheet: Table S1
Table S1 Primer sequences used in this study
Primer name	Primer Sequence
GAPDHF	CCGCTAACTGCCTTGCTCCACTT
GAPDHR	GCGGCTCTTCCACCTCTCCAGT
Br30284qF	CCGCCTTCTCTAAGTTCGGC
Br30284qR	ACCATCGAGATCCTGTCCGT
WK1409qF	GAAGGTCAAGGGGGTTTGGA
WK1409qR	CGGGGAGCACTTGGTCTATC
P27- Br30284F	TT GGAGAGGACACGCATGGCGTCCCCTGATGTTG
P27- Br30284R	AAGCAGGACTCTAG GGACTATTACCAACCACCACCACC
P27- Br14000F	TTGGAGAGGACACGCATGGCTTTCTGCAAAAGTC
P27- Br14000R	AAGCAGGACTCTAGGGACTATTAGTAACCGCCTCCATCA
P27-35s	CGCACAATCCCACTATCCTTCGCA
P27OCSTR	TTAGGTTTGACCGGTTCTGC

## Sheet: Table S2
Table S2 Information on BrGRP genes in Chinese cabbage
BRAD ID	Class	Number of amino acids	Molecular weight	Theoretical pI	Instability index	Aliphatic index	Grand average of hydropathicity (GRAVY)	Protein sequences	Subcellular localization
Bra022895	Ⅰ	213	17207.7	9.92	69.25	54.93	0.123	MGLISRRACVFIFVFALVAEFVFGHVEVKDDKHLFHKPRPFFHKKGFRKGLGGGGGLGGG GGLGGGGGLGGGGGLGGGGGLGGGGGLGGGGGLGGGGGLGGGGGLGHGGGLGGGGGLGGG GGLGHGGGLGGGGGVGGGGGLGGGGGLGGGGGLGGGAGGGYGGGAGGGLGGGGGAGGGGG FGGGGGYGGGGGFGGGAGGGGGFGGGYGGGGHH	Extracellular (Secreted)
Bra021807	Ⅰ	215	18145.9	9.95	54.55	53.07	0.018	MGLIARKVCVFIFVFALVAEFAFGNVEVNDDKHFFHKPRPYFHKPRPYFHKHGIYKKGFR KGLGGGGGLGGGGGLGGGGGLGGGGGLGGGGGLGGGGGLGGGGGLGHGGGLGGGGGLGHG GGLGGGGGLGGGGGLGGGGGLGGGGGVGGGAGGGYGGGAGGGLGGGGGAGGGGGFGGGGG YGGGGGFGGGAGGGFGKGIGGGGGLGGGYGGGGHH	Extracellular (Secreted)
Bra035778	Ⅰ	185	14209.3	9.82	58.6	56.59	0.252	MASKSMLLVALLVSSLALTSFASVPNRKLKSGLEDQKTFFHHPGGGLGGGGGLGGGGGLG GGGGLGGGGGLGGGGGLGGGGGIGGGAGGGLGGGAGGGGGLGGGAGGGGGLGGGAGGGAG GGFGGGAGGGAGGGAGGGGGFGGGAGGGGGLGGGGGAGGGFGGGAGGGFGGGAGAGGGYG ASGLP	Extracellular (Secreted)
Bra031784	Ⅰ	109	9453.76	7.92	34.17	96.7	0.549	MKGTFTNLLVLLFIALVCANVGARKLISGDTQFKDEKFLGGGGGAGGGLGGIGIGAGINA GINAGIGGGLGGGGLGGGGGGLLGGGGGLLGGGGLDGGGGGLGGGGGFP*	Extracellular
Bra024074	Ⅰ	159	13334.9	8.98	60.04	52.83	-0.154	MAVSKSSSLVLITLILATSCLVSESRIARKDLGLDLGGIGVGIGTGIGIGLGGGGSGSGA GAGSGSGGGGGSSSSSSASSSSSSSSGGGGGDAGSEAGSYAGSRAGSGSGRSSGSGRGRG GGGGGGGGGGGRGGGGGSGNGGGYGEGGGYGGGYGGGGD	Extracellular (Secreted)
Bra011196	Ⅰ	164	13719.2	5.08	59.02	52.38	-0.166	MSVSNSSSLVLITLILATSCLVSESRIARKDLGLDLGGIGIGIGTGIGIGLGGGGSGSGA GAGSGSGGGGGSSSSSSSSSSSSSSSGGGGGDAGSEAGSYAGSRAGSGSGGSSGSGRGRG GGGGGGHGGGGGGGGGQGGVGGSGNGGGYGEGGGYGGGYGEGGD	Extracellular (Secreted)
Bra015834	Ⅱ	162	17133.3	9.5	63.73	53.46	-0.607	MKPVSSLVIIFLLVLILQTNILESGHVRPNVQDAVKNNTDNNNTTTGVVLKDKKRSYNGG SGSYRWGWGGGGGGGGGGGGGGGGGRGWGWGGGGGGGGWYKWGCGGEERRKGREGRGEFV KREYAECKGNGKCRGKILECPQHCGGFCFYDCLFLCKPHCRR	Extracellular (Secreted)
Bra008205	Ⅱ	175	17726.9	9.63	68.43	51.2	-0.557	MKTSSSLVVIFLLVLILQTNKLESGHVHSTDQDTVKNINNNIDKSNIATKIVLKDKKISS HGGGSNSYRWGGGGGGGGGSGGGGGGGGGGGGGGGGGGGGGGWGWGGGGGGGRGWYKWAC GRGGGREGRGEFVKREYAECKGKGKCRGKRLECPQHCGGFCFYDCLFLCKPHCRR	Nuclear
Bra013175	Ⅱ	128	13252.5	8.2	23.42	47.34	-0.649	MASKSLLLLSLIVVILIASEVAARDLADSSAENKNNEREEGMQTDQYGGYPGRGYGGYPG GGYGGNRGGGYGGNRGGGYGGRGGYGGRGRGYCRYGCCYRGYYGGCSRCCAYAGEAVQTQ PESTDPAH	Extracellular (Secreted)
Bra040764	Ⅱ	95	9617.7	5.67	45.69	68.74	0.044	MASKSFVLLGLFALIFVVSEVATASALQSGTVNLGSEETVEPDQYGGGHGGHGGYNIEGG SGGLCAHGCCSKRSGTVCYRCCSYAGETVQTQPGH	Extracellular (Secreted)
Bra021675	Ⅱ	116	11736.8	8.81	21.03	45.34	-0.479	MASKTLFLLGLFAFLLVVSVVAASESQPGTVKSESGQTVQPDQYNGGHGGHGGYNGGGHG GYNGGGHGGYNGGRGGYNGGRGGGGYCRHGCCYRNYRGCVRCCSYAGEAVQTQPGH	Extracellular (Secreted)
Bra013176	Ⅱ	128	12424.3	7.65	38.91	40.39	-0.556	MASKALVLLGLFAVLFVISEVAATSEGQSVKSESEDTLQPDHSGGGGQGYNGGGGYNGGG GYNGGGHNGGGYNGGGHHGGGGGRGGGGYNGGGRGGGYCRHGCCYRGYRGCSRCCSYAGE AVQTQPGH	Extracellular (Secreted)
Bra038836	Ⅱ	112	12125.6	9.1	22.37	29.55	-0.586	MFVTSSQASRQLWDSEFHDFFSKSGFHGINKVHGIQGFHHGTHGIPKFPGTGNFMSGVHT CSMQGPCKGKKLKCPETCYKSTNVNKEGYKSTSKSGGCSFDCTTKCSATCSS	Extracellular (Secreted)
Bra038769	Ⅱ	133	13057	9.76	26.96	54.29	-0.059	MFAKPILLASLLLIIFVSATHSARQKSGNNGLGFAGVPGSGYAGIPGFGNGFPGTGVGGG YGGGYGGPSGGYGKGGVVRPTVTCKEKGPCNGKKLRCPARCFSSFSRSGKGYGGGGGGGG CTMDCKKKCIAYC	Extracellular (Secreted)
Bra038559	Ⅱ	106	11242	9.28	57.11	66.23	-0.185	MSKTSILLPFLLLIIFVSTSQANRQLWDGGLLGSKSGVNGIPGLQGNVNWMNPTHTCTMQ GPCRGKKLTCPAACYKSSNVNKEGYKSSSKSGGCTFDCTNKCTASC	Extracellular (Secreted)
Bra027092	Ⅱ	155	15885.2	9.68	34.43	49.61	-0.425	MTTKLIVLFTLLLLTLTLSHSRPTGPESVSDQLKKSSKGNNNKNDKGYGSGGYFGPGTGS VPGTGFGLPGFTGKDWGNIGGGYGGGYGGPTGGYNKGGVVRPTVVCKEKGHCYMKKLRCP AKCFKSFSRSGKGYGGGGGGGGCTIDCKKKCMAYC	Extracellular (Secreted)
Bra020903	Ⅱ	131	12880.8	9.73	31.32	51.3	-0.036	MFTKPIILASLLLIVFVSATHSARHKSGNDGSGFGGVPGFDGIPGFGNGFPGTGVGGGYG GGYGGPSGGFGKGGVVRPTVTCRVKGPCNGKKLRCPAKCFSSFSRSGKGYGGGGGGGGCT MDCKKKCIAYC	Extracellular (Secreted)
Bra040817	Ⅱ	123	11934.8	9.52	27.75	36.5	-0.863	MASKTLIMLGVFAILLVVSEMAAASAQKSESEETVQPDRYGGGHGGNEGYNGRGGYNRGG HNGGGGYKGGGGYNGRGGYNGGGGYNGGRGGGYKGGRGGHGGHGGRGGHGGHGPEAVQTQ PGN	Nuclear
Bra028695	Ⅲ	88	9170.2	9.52	20.94	157.5	1.655	MLSFLISLLDIIKLVIASATFLFFLAFSGLTFAGSAVALVVSTPLFIIFSPILVPATIST TLLASGLAAGTSLGLSAIGLIMRLIKYY	Extracellular (Secreted)
Bra028693	Ⅲ	2038	203911	10.32	60.1	41.13	-1.11	MREEEHQNELVQTPSQRAENCFRCNVFAFLTPLLEVIKVVAAPVASVIFIGFAGIILAGL AVALAVSAPLLIIFSPVLVPAATIATTLGTGVAFAVTSVALIIWLTKHRMGVKPEHNPPP RGAPPTRSSSSRTGSSSSRSKGKHLVKDILKKIIKSKIKSILKGKNSSSVKEDSSMNRIK STEKSHGNSSDGQKSPVNKISPNRENSCTCESLPKNESKHAGKNPPMSESSSSAGSSSRG GNSPGEKKTPKNESKHKGKNTKVKSKTKSKLKNKIGSSGGESSPSGEISPGSGNSSSNTS SPKDVSKHNGKKNIIDKVKSKIKSKLNGKNSSSGGGGSQRSEGSPSGINTPVSGNSSNSA NSPKNTGKHKNKSTIVDKLKSKIKSKLKGKSGP…	Extracellular (Secreted)
Bra009255	Ⅲ	108	11390.8	7.87	36.22	134.54	1.289	MSEELVQHESHSQASIFSRFFRMFSFIFPLLNVIKLIIASVTSLVCLAFSCVALGGSAVA LIVSTPLFIMFSPILVPATIATTLLASGLMAGTTLGLTGIGLIMGLVR	Extracellular (Secreted)
Bra009254	Ⅲ	304	30078.3	9.52	30.84	54.93	-0.709	MVVASVASVVYLGFAGVTLSGSAVALAVSTPLFIIFSPILLPAIAATTVLAAGLGGKKVA AAPEASPAASPSLSLLGIPESIKPSNIIPESIKPSNIIPEGIKPSNIKDKIKDTIGKVKN KIKAKKEEKSKGKSEDSSKGKGKSKGEDTTTDDDTTTDEDKHGSGAKHGKGESKHGKGES THGKGGKHGSEGKHGSGGSSMGGGKHGSGGKHETGGKHGSGGKHESGGSAMGGGKHGSGG KHGSEGKHGGEGSSMGKNSLSKKKKEFHYRGQAMDASSTSESSDGSSDGSSSDGSSHGSG GKHI	Extracellular (Secreted)
Bra005944	Ⅲ	207	21751.4	10	24.56	82.46	-0.189	MKEEIQNETAQTLSQREGRMFSFLFPVLEVIKVVMASVASVVFLGFGGVTLACSAVALAV STPLFIIFSPILVPATIATTLLATGLGAGTTLGVTGMGLLMRLIKHPGKEGAASAPAAQP SFLSLLEMPNFIKSKMLERLIHIPGVGKKSEGRGESKGKKGKSEHGRGKHEGEGKSKGRK GKSRGKDKDKKKGKGSRKGSSDDDESS	Extracellular (Secreted)
Bra005943	Ⅲ	266	26612	10.21	56.37	78.05	0.056	MFSFLIPLLEFIKVVIASFASVVFLGFAGVTLAGSAVVFAVSTPLFIIFSPILVPATIAT TLLATGLGTFALFGVTAVGLIIWLLKHRMGVKPANNPPPAGAPPTGSPPAAPEAPAAPAA PEAPAAPAAPEAPAAPAAPAAPAAAPPAPPAPAAPPAAPAPPAPAAPPAPPSFLSLFEMP SFIKSKLIEALINIPGFGKKSNDRGKSKGGKKSKGKGKSNGRGKHEGEGKSKSRKSKSRG KDKEKSKGKGIFGRSSREGSSDDESS	Extracellular (Secreted)
Bra009253	Ⅲ	386	38730.7	9.48	24.32	52.2	-0.81	MLSSLIQIFQVFQVTSAVVVTAVLFALAGITLAGSVVGLIVATPLFVIFSPVLVPATIAS TLLATNLSAGALFGVTAAALIVWLFKHRMGVHPKNNPPPAGAPPTEADKPAEGTTEKPKD NSTGGAADKPEDKPVGGAADKPEGKPDGGATNKPESKPAGGPSNKPKDKPAGGPTDKPES KPADKPAGGPTDKPGSKPVDKPAGGPTDKTESKLVGEASNKPKDKPAGGSTDMPEAGETS NKPKDKSVGGPTNKPESKPAGETSHKPKDKPAGGPTDKPESKPAGETSHKPKDKLAGGPT DKPESKPAGEASNKPKDKPAGGPTDKLAGGSVDKPKDKPAGGPTDKPTNKLTGGAANKPA GEAANKPTGKPKNKPAGENKPPGWYR	Extracellular (Secreted)
Bra028692	Ⅲ	98	10097.2	10.46	31.55	130.61	1.044	MGILRKKKHERKPSFKSVLTAILATHAATFLLLIAGVSLAGTAAAFIATMPLFVVFSPIL VPAGITTGLLTTGLAAAGGAGATAVTIILWLYKYLTLT	Extracellular (Secreted)
Bra028691	Ⅲ	149	14906.9	11.56	55.55	108.26	0.632	MGVLRKKHNKKSRRPSFKSVLTSILATQAAIFLLLLAGVSLAGTAVAFIASMPLFVVFSP ILVPAGVATGLLATGLAAAGSSGAMAVSLILWVIKRVTGKEPPKIMSKVLRKVFPGGGTP SKLAAKPEAEPAAAPAAAPSAAPAAAPST	Extracellular (Secreted)
Bra009251	Ⅲ	80	8304.03	9.99	21.18	136.62	1.385	MFFQIIQGVFTGVEALALLAFAGITLGGSAVGLALSTPLFILFSPILVPATIATTLLTTG FTTSGGLGIVALRIFWKLFK	Extracellular (Secreted)
Bra005945	Ⅲ	79	7901.57	5.75	22.01	136.08	1.603	MFEIIQAAITGGAALALLVLAGITLGGSAVGLAVTTPLFVIFSPILVPATIATAFLATGF TASGSIGAMAITIFMWLFK	Chloroplast
Bra035944	Ⅳa	263	25906.5	4.62	28.71	43.84	-0.46	MAFLSKFGNILKQTNANGSLSSPSLFQAIRCMSSSKLFIGGMEYGMNEDSLREAFSKYGE VVETRVILDRETGRSRGFGFVTFTSTEAASSAIQALDGQDLHGRIVKVNYAHDRTSGGGG YGGGGYGGGYGGGGGYGGGSGGYGGGVAGGYGTSGGYGSSGYGESSTASAAGAVGGYNGS GGYGEGSTANAGAVGGYGSDNAYGSNNGGFAGENQVGGDNSQFSGENTQFGGGGQSGGET QFGGMENGAVGDFEDDTDVAKRA	Nuclear
Bra012986	Ⅳa	305	29524.3	4.79	21.97	39.41	-0.467	MAFLSKFGNILKQTNARGSLSTGPSLFQAIRCMSSSKLFIGGMEYGMNEDSLREAFSKYG EVVETRVILDRETGRSRGFGFVTFTSTEAASSAIQALDGQDLHGRIVKVNYAHDRTSGGG YGGGGGGYGGGGYGGGGYGGGGYGGGGSYGGGAGGYGGGAGGYGSGTGGYGGGASGGYGG GYGASGGYGSSGSGYGEGASAGAVGGYNGSNGYGEGSTASAGDVGGYNGSGGYATGNTYG SNNGGFAGENQFGGNPVGNGSQFGGDNTQFGVGGEAQFGSSMEKPEMINGPVGDFEDDTD VAKRA	Nuclear
Bra015926	Ⅳa	285	28032.7	4.73	37.8	40.14	-0.549	MAFLSKVGKIFRQTSAHVTASNSMLQSIRCMSSSKIFVGGISYSTDEFGLREAFSKYGEV VDAKIIVDRETGRSRGFAFVTFTSTEEASNAMQLDGQDLHGRRIRVNYATERGSGFGGRG FGGPGGGNAGGYGAPSGGYGGGGGYGGGAGGYGAPAGGYGGGGYNAPGGGYGGGSSYGGN AAGGGYGGNSPYGGNAGGGGGYGVAGGVGGSDNFAQGSSSNAGFDDKFSSSETLGNDTDH QLESAGGEQFGGSDNQFGDSENGQTEIGGPDGFDQTDDGDVAKKA	Mitochondrial
Bra008142	Ⅳa	264	26640.3	4.68	35.84	42.16	-0.569	MAFLSKVGRIFRQTSAHVTASNSMLQSIRCMSSSKIFVGGISYSTDEFGLREAFSKYGEV VDAKIIVDRETGRSRGFAFVTFTSTEEASNAMELDGQDLHGRRIRVNYATERGSGFGGRG FGGPGGGYGAPAGGYGGGGGGGYGTPSGGYGGGSSYGGNAGGGGYGGNSAYGGNAGGDGY GSNFGVAGGVGGSDNFAQGSSSSAGFDDKFSSDVPLGNDTDHQLESGEQFGGSDNQFGDS ENRQTEVGPDGFDQTDDGDVAKRA	Mitochondrial
Bra008020	Ⅳa	208	23648.1	4.59	35.7	89.47	0.247	MLLFLMFRSLIDCSLFAGFSEFDLGFNLCHQKKVEFYIGDALRQTSTNVTDSNSMLQSIR CMSSSKIFVGGISYSTDEFGLREAFSKYGQVVDAKIFVDRETGRSRGFAFVTFTSNLEAT NAMQLDRQAIYCFCFLEHSTFMVEELGWTSLLKEEEDLEEGGWVVQVVVLFFMMILYRVV TLTIFLFGAIDNLAWQFGGSENESLIPP	Mitochondrial
Bra037056	Ⅳa	150	15263.8	6.24	36.25	63	-0.279	MAFCKSLGGLLRQGVVSQTGNIPVTSVLGSLRYMSTKLFVGGLSWGTDDQSLREAFANFG EVVDAKVIVDRETGRSRGFGFVNFTDETAANTAISEMDGKDLNGRSIRVNVANERPSTPR YGGGGGYGGGGGGGYGGGSYGAGGGDGGGY	Mitochondrial
Bra014000	Ⅳa	222	20404.7	6.23	55.32	40.41	-0.405	MAFCKSLGGLLRQGAVSQTGNVPVQSMLGSLRYMSTKLFVGGLSWGTDDQSLREAFSNFG EVIDSKVIVDRETGRSRGFGFVNFSDESAANAAISEMDGKELNGRNIRVNVANDRPSAPR AYGGGGGGYGGGGGGYGGGGGGYGGGGGGYGGGGGGYGGGGGGYGGGGGGYGGGGGGYGG GGGGYGGGGGGYGGGGGGYGGGGGGYGGGGGGYGGGGDGGGY	Nuclear
Bra013997	Ⅳa	145	14844.3	6.24	45.46	61.86	-0.339	MAFCKSLGGLLRQGAVSQTGNVPVQSMLGSLRYMSTKLFVGGLSWGTDDQSLREAFSNFG EVIDSKVIVDRETGRSRGFGFVNFSDESAANAAISEMDGKELNGRNIRVNVANDRPSAPR AYGGGGGGYGGGGGGYGGGGDGGGY	Nuclear
Bra025674	Ⅳa	145	15363.4	9.89	41.92	74.62	-0.217	MHYMDLFSKAGNIFRQPRALQAANAMLQGNLSLTPSKLFVGGLSPTTDVDILKDVFGRFG KIVDVVVISDRETGVSKGFGFVTYDSIDAANKAMQQMNDQELDGRIIGVNPADSGGGLAR RGGRGGGRGGFGRGGFGRGGYNFVR	Mitochondrial
Bra011869	Ⅳa	162	15824.8	5.58	43.64	31.91	-0.794	MSAEVEYRCFVGGLAWATGDAELERTFSQFGEVIDSKIINDRETGRSRGFGFVTFKDEKS MRDAIDEMNGKELDGRTITVNEAQSRGSGGGGGRGGGGYGGRGGGGYGGGGGGYGDRRGG GGYGSGGGGRGGGGYGGGGGYGGGGGRREGGGDGGYGGGGGW	Nuclear
Bra010693	Ⅳa	165	16048	5.24	46.87	30.18	-0.804	MSGEAEYRCFVGGLAWATADADLERTFSQFGEVIDSKIINDRETGRSRGFGFVTFKDEKS MRDAIEEMNGKELDGRTITVNEAQSRGSGGGGGGRGGGGGYRGGGGGGYGGGGGYGGGGG GYGRRDGGGYGSGGGGGYGGRRDGGGYGGGDGGYGGNSGGGGGGW	Nuclear
Bra005433	Ⅳa	77	8088.96	5.69	24.27	74.68	-0.604	MRDAIDEMNGKELNGRTITVNESQSRGSGGGGGRGGGEYGGRGGGDCGSLDQHGFARDKI WVIDDNLPLRVLKIIIS	Nuclear
Bra001972	Ⅳa	164	16740.7	5.12	52.57	32.74	-0.934	MDSAESEYRCFVGGLAWATDEQSLGRTFSEFGEVLDSKIIIDRETGRSKGFGFVTFKDEE SMRAAIERMNGQELDGRNITVNEAQARSSRGGNGGGYNRGGGGYGGGGYGSGGGGYGGRR DQGGYGGGGGGYGGGGYGGGRREGGYGGGDGGYGGRSDSGNWRE	Nuclear
Bra031210	Ⅳa	168	16199.1	5.5	58.46	31.37	-0.764	MASPDVEYRCFVGGLAWATDDRALETAFSQFGDVLDSKIINDRETGRSRGFGFVTFKDEK SMKDAIEGMNGQDLDGRSITVNEAQSRGSGGGGGGRGGGGGGYRSGGGGGYGGGGGGYGG GGGRREGGYSGGGGGGYSSRGGGGGGGYGGRRDGGEGGGYGGSGGGGW	Nuclear
Bra030284	Ⅳa	168	16259.2	5.54	59.88	30.77	-0.778	MASPDVEYRCFVGGLAWATDERSLETAFSKFGELVDSKIINDRETGRSRGFGFVTFKDEQ SMKDAIEGMNGQDLDGRSITVNEAQSRGSGGGGGGRGGGGGYRGGGGGYGGGGGYGGGRR EGGYSGGGGGGYSRGGGGGGYGGGGRREGGGYGGGDGGGYGGGGGGGW	Nuclear
Bra032933	Ⅳb	243	26653.5	8.58	34.48	23.79	-1.468	MSEEAEYRCFIGGLAWATSDRGLRDAFEKYGHLTEAKVVLDKFSGRSRGFGFVTFDEKKA MDEAIAAMNGMDLDGRTITVDKAQPQGASGRDHDGDRSRDRDRDRGYDRDRSRPSGGGRG GSGGGDCFKCGKPGHFARECPDESGRGGGGGGRYSSRDDRYSSKDDRYGGKDDRYSSKDD RYSAKDDRYGAKEDRYGGRDRYGPDRSGERSGGRSRDDGSRGGSGGERHGRAPYDRPRDG GFH	Mitochondrial
Bra025205	Ⅳb	232	25523.5	8.98	34.54	29.09	-1.374	MSEEVEYRCFIGGLAWSTSDRGLRDAFEKYGHLLEAKVVLDKFSGRSRGFGFITFDEKKA MDEAIAAMNGMDLDGRTITVDKAQPLQGGSGRDHDGDRSRDRGYDRDRSRPSGGRGSGGG DCFKCGKPGHFARECPDESGRGGGGRYSSRDDRYGAKDDRYSSKDDRYSAKDDRYGAKED RYGRDGGRDRYGPDRNGDRSGGRSRDGGSRGGPGGERHSRAPYDRPRTGGFH	Nuclear
Bra027145	Ⅳb	52	5704.52	8.8	4.46	65.58	-0.452	MVGEDTGRPCGFAFITCSYHRGADDAIKHMRGRELGDRVISVNKAEPKVGVR	Extracellular (Secreted)
Bra005798	Ⅳb	306	33381.3	9.27	42.04	36.08	-1.039	MATKEGSRIFVGGLSPEVTERDLQRTFGRFGEILDCQIMMERDTGRSRGFGFITFADRRA MDESIREMHGRDFGDRVISVNRAEPKMGGRDDGESHGSRGGGRDGGYSLAGKGSFGGGGR VGEDECFKCGRVGHWARDCPSAAGGRGGPVGGFSSRSAYGGSDGRVDRYADRERYVDRER YIDDRYDGGAPRFGARDRFDSREAYIPRDRYASDRYAAPVDRFAGGDRYSRGSDRYPPAS YEKPRSFERDVVPSAGSDRYGGGRAGGPIRGGDEGRGFRSRASGPYDRPSRSSGGGYPSS GTLDRY	Extracellular (Secreted)
Bra031159	Ⅳc	199	18788.7	5.61	57.6	22.51	-0.786	MSGGDGNNGGERRKGSVKWFDTSKGFGFITPDDGGDDLFVHQSSIRSEGYRSLAPEESVE FEVEVDNSGRNKAVEVTGPDGAPVQGSSGGSSGGRGGFGGGGRGGGRGGGYGGGGYGGGG GGYGGGYGGGRGGGGGDGACYKCGEPGHMARDCSQGGGGGGYGGGGSYGGGRGGGGGGGS CYSCGESGHFARDCTSGGR	Plasma membrane
Bra030325	Ⅳc	205	19391.4	5.92	59.39	24.24	-0.764	MSGGDGNNGGGRRKGSVKWFDTQKGFGFITPDDGGEDLFVHQSSIRSEGYRSLAPEESVE FEVEVDNSGRTKAIEVSGPDGAPVLGNSGGSSGGRGGFGGGGRGGGRGGGGRGYGGGDSY GGGGYGGGGGYGGGGYGGRGGGGGDGACYKCGEQGHMARDCSQGGGGYGGGGGGRFGGGG GGGGGSCYSCGESGHFARDCTSGGR	Extracellular (Secreted)
Bra010944	Ⅳc	126	11485.1	9.12	79.99	17.14	-0.69	MAATISSFTSPPSDLRASEASPRRSLSSSSSGGGSSGGGRGFGGGGRGGGRGFGGGRGGG GRGGSDCYKCGEPGHIARDCSEGGGGYGGGGGRGGYGGGGGGGGGGSCYSCGESGHFARD CTSGGR	Extracellular (Secreted)
Bra017742	Ⅳc	263	26160.4	6.64	39.78	38.29	-0.637	MALEEQSAARSTGKVNWFNDSKGYGFITPDGGGEELFVHQSSIVSEGYRSLAIDDLVEFE ITQGTDGKTKAVDVTAPGGAPLKKKETSSRGGGARRVGGGGGCYNCGEAGHLAKDCRDDG GERGGGASCYSCGESGHLARDCVQKSSGGERGGASGGGGCYTCGEAGHFARDCVQKGSGG GERGNGGGGGACYTCGGVGHMARDCATKRQSGTCYECGGTGHLARDCDQRGSGGGGGRNA GGGGGKCYKCGEGGHFARDCSVA*	Extracellular
Bra011655	Ⅳc	284	28493.2	8.01	48.44	37.18	-0.662	MALENQSAARFTGKVNWFNDSKGFGFITPDDGTTEELFVHQSSIVSEGYRSLAIDDLVEF EIALGTDGKTKAVEVTAPGGAPLKKKEASSRGRSGRGGGCYNCGEAGHLAKDCRDGGERG ACYTCGDTGHLARDCVQKPSGERGGGRGGGGCYECGDTGHLARDCVKKSGGERVSGGGGG GGACYTCGGSGHMARECPSKRQSGGSGCYECGGAGHLARDCDKRGGGGRSSGGCYECGGA GHMARDCEKRGSGGGGGRSSGGGGGGKCYKCGEGGHFARECSVA*	Extracellular
Bra010757	Ⅳd	382	39400.7	5.79	35.23	44.97	-0.66	MDSDQGKLFVGGISWETDEDKLREHFSSYGDVSQAIVMRDKLTGRPRGFGFVIFSDPSLL DRVLQDKHHIDSREVDVKRAMSREEQQVSGRSGSFNATRGSGGDAYNKTKKIFVGGLPPT LTDEEFRLYFEQYGPVADVVIMHDQTTSRPRGFGFVSFDSEDAVDRVLQKNFHDLNGKQV EVKRALPKDANPGGAGRAMGGGGGGGYQGFGGSEGGFDGRMDFNRYMQPQNVGNGLPSYG GSSGYAAGGGYGNGSNGAGFGGYGGYGAGAGAAYGATGMPGGGYGSSVAPRNAWDTPSAP SGYGNPGGYGNGAAQSGYGAPPAQTQYGYGGYSGSGEAGYGNQAAYGAVGGRPSVGGLNN PGGGYMGGYDPSQGYGLGRQGQ	Nuclear
Bra022938	Ⅳd	408	41511.9	6.09	35.62	44.49	-0.583	MESDQGKLFIGGISWDTDENLLKEYFANYGEVLQVTVMREKATGRPRGFGFVAFSDPAVI DRVLQEKHHIDNRDVDVKRAMSREEQSPGGRPGGFNASRSFDSGASVRTKKIFVGGLPPA LTSDEFRAYFETYGPVSDAVIMIDQATQRPRGFGFVSFDSEDSVDLVLHKTFHDMNGKQV EVKRALPKDANPGIAGGGRGGSGGFPGYGGGSGGSCYEGGRVDSSSRYMPPQNVGSGYPP YGASGYGTGYGYGSNGVGYGGFGGYGNPAGAPYGNPAGVPGAGFGSGPRSSWGGQAPTGY SNVGYGNAAAPWVGGSGPGSAVMSQGGGASAGYGSSQGYGYGGNDASYGAPSGYGAVGGR PGSMPNSHGGGYADGSDGSGGYGNLNHQGNGQA…	Nuclear
Bra021850	Ⅳd	367	37433.6	6.08	34.54	48.34	-0.56	MESDQGKLFIGGISWDTDENLLREYFSNYGEVLQVTVMREKATGRPRGFGFVSFSDPAVI DRVLQSKHHIDNRDVDVKRAMSREEQSPGGGSRPVGSFDNVRTKKIFVGGLPPALTSDEF RAYFETYGPVSDAVIMIDQTTQRPRGFGFVSFDSEDSVDLVLHKTFHDLNGKQVEVKRAL PKDANPGVVGGGGGRGGGGFSGYGGGGYEGRVDSSRYLPPQNAGSGYPPYGGSGYGYGSN GVGYGGFGGYGNPSGAPYGNPGVAGAGFGSGPRSSWGGQAPSGYGNVGYGNAPAAAPWGG SGPGSAMMGQGGASAGYGYGAVGGRPNSLGGGYADGSDGSGGYGNHQGNGQGGYGGGFGS GHQALQQ	Nuclear
Bra005496	Ⅳd	376	38601.6	5.89	37.17	45.66	-0.675	MESDQGKLFIGGISWETDENILREYFSNFGEVLQVTVMRDKATGRPRGFGFVAFSDPAVI DRVLQDKHHIDNRDVDVKRAMSRDEQSPAGRQGGFNGNRSFDSGANVRTKKIFVGGLPPA LTSDEFRAYFETYGPVSDAVIMIDQATQRPRGFGFVSFDSEDSVDLVLHKSYHDLSGKQV EVKRALPKDANPGVAGGGSRGGGGFPGYGGSGGSGYEGRVDSSRYMPPQNAGSGGYPPYG GGYGNPSGAPYGNPGGPGAGFGSGPRPSWEGQAPSGYGNNVGYGNAAAAPWGGSGPGSVG IGQGGAAAGYGSQGYGYGGNDSSYGTQSGYGAVGGRPNSHGGGYADVSDGSGGYGNHQVN GQAGYGGGYGRQAQQQ	Nuclear
Bra025568	Ⅳd	545	56579.2	8.32	44.09	49.5	-0.708	MDPYATEAVVDEENHEVKPSEDVEDDDDKSQPQSGGGIDSAGKIFVGGLARETTSAEFVK HFEKYGEITDSVIMKDRKTGQPRGFGFVTYADSSVVDKLIQDNHIINGKQVEIKRTIPRG SMSSSNEIKTKKIFVGGIPSTVDDDEFKEFFMQFGELKEHQIMRDHATGRSRGFGFVTYE SEEMVDLLLAKGNRIELSGTQVEIKKAEPKKPNSVTTPSRRFGDSRSNFGGGYGDGYGGG PGGGYGGPDGPYKSGGGYGGGRSGGYGGYGGEFGGYGGGGYGGGVGPYRGGEPPLGYSGR YGGGGGGGYNRGGYGMGGGGGGGGYGGGPGDMYGGPYGEPAGGYGGPSGSYGSGYGSGGY GGGGYRGSSGGYDMGGTGVGGGGGYPSGGGGAS…	Extracellular (Secreted)
Bra039380	Ⅳd	362	37676	8.69	36.15	38.76	-0.775	MGSRSRNENFQSGDGASPGKIFIGGLHKDTTNTEFNKHFGKYGEITDSVIMRDRHTGLPR GFGFITFADPSVVDQVIDDTHSFNGKQVEIKRTIPKGAGSGGNQSKDFKTKKIFVGGIPS SVTEDELKDFFAKYGTIVEHQIIRDHETNRSRGFGFVIFDSEEVVDELLSKGNMVDMADT KVEIKKAEPKKSSNRSPPSYGSHPRGRSSFNDSYGGPYGGPYGGFDGGYGPPPGPIRSHG GPPSRFAAGYGYGRGGVGPEFGGGYGGYGGGSLGYRSEPPLGYSSRFGPYGSGFGGEGYG GGGGGGGYGRGGGEGYGGYGGGPGYGGGFESGGPGGSYEGAGGPGPYGRGYSSSSRYHPY AR	Nuclear
Bra037177	Ⅴ	144	15139.5	8.81	45.61	33.26	-1.36	MASYQNRPGAQATDEYGNPIQQLDEYGNPIGRGATGGGGGRHHGQEQLHKESGGGGLRGM LHRSGSGSSSSSEDDGQGGRRKKKGITDKIKEKLPGHHDQSGQSQGMGMGTTTGYDEGGY AGERHEKKGMMEKIKEKLPGGGHH*	Cytoplasmic
Bra031809	Ⅴ	192	18844.2	7.14	33.09	32.14	-1.021	MASYQNRPGAQATDEYGNPIQQLDEYGNPIGGGGYGTAGGGLGATGGGGYGTAGGGYGGG ATGTYGTGGEGYGTGTGALGAGAGGRHHGQQQLHEESGGGRGLGGMLHRSGSGSSSSSED DGQGGRRKKKGITDKIKEKLPGHHDQSSGQSQGMGMGTTTGYDAGGYGGERHEKKGMMEK IKEKLPGGGGHH*	Cytoplasmic
Bra040014	Ⅴ	230	24244.3	9.61	41.53	58.09	-0.448	MNALSRPLPIRPRQQQQTYGGYGSNLGLNPRYGSGAYGSGPSGLGYGSNVGLNPRYGSLY GGGMYGGGSMYSRGVYGGGGLYRGSGMYGGYGMGMGMSPYGGQDSNDPNNQPPSPPGFWI SFLRVLQGAVSFFGRVAMLIDQNTQAFHMLMSALLQLCDRGGMLYGELARFVLCLLGVKT KPRKMQQQQQPQGSNGVPLPHQPHGNQNCVEGTKAAAPGGGGGWDNLWGN*	Extracellular
Bra029657	Ⅴ	289	30129.5	9.27	44.07	41.21	-0.577	MASSQPSGGRPPKPWEQEGNNNAAGPKPFRPPSNTSTADSVEASGTANPGELVSSVNRTN TAPTMNGLSRPVPTRPWEQQTYGGYGSNLGMNSGYGTGLGGYGSFGGGMYGGSGMYNRGG YGGGGGLYGSSGMYGGGGMYNSSFGGGYGMGMGTGMGMSPYGGQDPNDPFNQPPSPPGFW ISFLHVMQGAVNFFGRVAMLIDQNTQAFHMFMSALLQLFDRGGMLYGELARFVLRMLGVR TKPRKMQQQPQGPNGLPLPHQPHGNQNYIEGPKAAAAPGGGGWDNVWGN*	Extracellular
Bra001257	Ⅴ	304	31411.8	9.22	43.52	36.61	-0.583	MATSGGSPPKPWEQEGNNNNASGPKPFRPPSNTSTADSVEASGTANPGELVSSANRTNTA ATMNGLTRPVPSRPWEQQQTYGSTYGGGYGSNLGMNSGYGSGTYGSGLGGYGSSYGGGMY GGSSMYNRGGYGGGGMYGSSGMYGGGGMYNSSFGGGYGMGMGTGMGMGMGMSPYGGQDPN DPFNQPPSPPGFWISFLRVMQGAVNFFGRVAMLIDQNTQAFHMFMSALLQLFDRGGMLYG ELARFVLRMLGVRTKPRKMQQPPQGPNGLPLPHQPHGNQNFIEGPKGGAAPGGGGGGWDN VWGN*	Extracellular

## Sheet: Table S3
Table S3 Distribution of BrGRP genes in the genome of Chinese cabbage
Name	Chromosome	Start	Stop	Strand	subgenome
Bra022895	A03	7634530	7635171	-	MF2
Bra021807	A04	14725015	14725662	-	MF1
Bra035778	A05	17850188	17850763	+	LF
Bra031784	A09	36518879	36519208	-	MF2
Bra024074	A03	27871144	27871623	-	MF1
Bra011196	A01	3386644	3387138	+	LF
Bra015834	A07	23904890	23905378	-	LF
Bra008205	A02	12813383	12813910	-	MF1
Bra013175	A03	20068852	20069635	+	MF2
Bra040764	Scaffold000252	40280	42136	+
Bra021675	A04	13907552	13908214	-	MF1
Bra013176	A03	20064203	20065068	-	MF2
Bra038836	A07	980087	980425	-	LF
Bra038769	A03	24199166	24199567	+	MF1
Bra038559	A09	5743177	5743497	+	MF1
Bra027092	A09	8835091	8835558	+	MF2
Bra020903	A08	10513631	10514026	-	MF2
Bra040817	Scaffold000269	36332	37545	+
Bra028695	A02	1130805	1131071	-	MF2
Bra028693	A02	1135563	1142055	-	MF2
Bra009255	A10	14636934	14637260	-	LF
Bra009254	A10	14639273	14640187	-	LF
Bra005944	A03	1337001	1338015	-	MF1
Bra005943	A03	1334184	1335327	-	MF1
Bra009253	A10	14641398	14643669	-	LF
Bra028692	A02	1148024	1148320	-	MF2
Bra028691	A02	1149751	1150857	-	MF2
Bra009251	A10	14645611	14645853	-	LF
Bra005945	A03	1340107	1340346	-	MF1
Bra035944	A09	3407613	3408724	+	MF2
Bra012986	A03	21224858	21226112	+	LF
Bra015926	A07	23473466	23474831	+	LF
Bra008142	A02	12404292	12405726	+	MF1
Bra008020	A02	11597841	11599511	-	MF1
Bra037056	A05	8993456	8994186	+	MF1
Bra014000	A08	4745631	4746563	-	MF1
Bra013997	A08	4781599	4782300	-	MF1
Bra025674	A06	6894300	6895239	+	LF
Bra011869	A01	141252	142017	-	LF
Bra010693	A08	15246647	15247397	+	MF2
Bra005433	A05	5451015	5451503	+	LF
Bra001972	A07	2973066	2973762	-	LF
Bra031210	A09	33744555	33745321	+	LF
Bra030284	A04	9735854	9736640	-	MF1
Bra032933	A02	21658715	21659586	+	MF1
Bra025205	A06	21725533	21726606	-	LF
Bra027145	A09	9196060	9196218	-	MF2
Bra005798	A03	698746	701385	+	MF1
Bra031159	A09	33997180	33997779	+	MF2
Bra030325	A04	9470383	9471000	-	MF1
Bra010944	A08	16444189	16444643	+	MF1
Bra017742	A03	30194324	30195115	-	MF1
Bra011655	A01	1237544	1238398	+	LF
Bra010757	A08	15501912	15503451	+	MF2
Bra022938	A03	7871232	7872735	+	MF2
Bra021850	A04	14966429	14967617	+	MF1
Bra005496	A05	5810845	5812185	-	LF
Bra025568	A04	8169492	8172535	+	LF
Bra039380	Scaffold000164	199820	201508	+
Bra037177	A09	4790529	4791152	-	MF2
Bra031809	A02	26892966	26897062	-	MF1
Bra040014	A01	25455523	25456489	+	MF1
Bra029657	A05	23513450	23514809	+	LF
Bra001257	A03	15569233	15570789	-	MF2

## Sheet: Table S4
Table S4 Orthologous pairs of GRP genes between Chinese cabbage and Arabidopsis thaliana
Gene name/ID in Arabidopsis thaliana	Gene name/ID in Brassica rapa	E-value	Class
AT2G32690	Bra022895	1e-15	Ⅰ
	Bra021807	7e-28	Ⅰ
AT3G20470	Bra035778	0.0001	Ⅰ
AT1G11850	Bra031784	3e-13	Ⅰ
AT4G30460	Bra024074	2e-08	Ⅰ
	Bra011196	4e-09	Ⅰ
AT1G75550	Bra015834	6e-19	Ⅱ
	Bra008205	4e-17	Ⅱ
AT2G05540	Bra013175	1e-05	Ⅱ
AT2G05520	Bra040764	3e-16	Ⅱ
	Bra021675	0.0002	Ⅱ
	Bra013176	9e-05	Ⅱ
AT4G21620	Bra038836	7e-29	Ⅱ
	Bra038769	1e-34	Ⅱ
	Bra038559	3e-22	Ⅱ
	Bra027092	8e-18	Ⅱ
	Bra020903	2e-25	Ⅱ
AT2G05510	Bra040817	0.18	Ⅱ
AT2G05530	-		Ⅱ
AT2G05380	-		Ⅱ
AT5G07530	Bra028695	4e-08	Ⅲ
	Bra028693	1e-10	Ⅲ
	Bra009255	1e-15	Ⅲ
	Bra009254	7e-09	Ⅲ
	Bra005944	4e-18	Ⅲ
	Bra005943	1e-24	Ⅲ
AT5G07540	Bra009253	1e-31	Ⅲ
AT5G07560	Bra028692	2e-14	Ⅲ
	Bra028691	5e-16	Ⅲ
AT5G07550	Bra009251	3e-14	Ⅲ
	Bra005945	6e-16	Ⅲ
AT5G07520	-		Ⅲ
AT5G45350	-		Ⅲ
AT5G07510	-		Ⅲ
AT5G61030	Bra035944	1e-51	Ⅳa
	Bra012986	5e-50	Ⅳa
AT1G74230	Bra015926	1e-54	Ⅳa
	Bra008142	2e-55	Ⅳa
	Bra008020	7e-39	Ⅳa
AT3G23830	-		Ⅳa
AT4G13850	Bra037056	3e-50	Ⅳa
	Bra014000	1e-51	Ⅳa
	Bra013997	4e-52	Ⅳa
AT1G18630	Bra025674	1e-48	Ⅳa
AT4G39260	Bra011869	3e-38	Ⅳa
	Bra010693	3e-38	Ⅳa
	Bra005433	1e-05	Ⅳa
	Bra001972	4e-32	Ⅳa
AT2G21660	Bra031210	5e-42	Ⅳa
	Bra030284	5e-40	Ⅳa
AT3G26420	Bra032933	1e-47	Ⅳb
	Bra025205	4e-54	Ⅳb
AT1G60650	Bra027145	3e-17	Ⅳb
AT5G04280	Bra005798	1e-99	Ⅳb
AT2G21060	Bra031159	2e-39	Ⅳc
	Bra030325	3e-32	Ⅳc
AT4G38680	Bra010944	3e-09	Ⅳc
AT4G36020	Bra017742	1e-59	Ⅳc
	Bra011655	2e-49	Ⅳc
AT4G14300	Bra010757	1e-97	Ⅳd
AT2G33410	Bra022938	4e-126	Ⅳd
	Bra021850	3e-110	Ⅳd
	Bra005496	3e-103	Ⅳd
AT1G17640	-		Ⅳd
AT5G40490	Bra025568	4e-116	Ⅳd
AT3G13224	Bra039380	2e-112	Ⅳd
AT5G66400	Bra037177	2e-09	Ⅴ
	Bra031809	4e-09	Ⅴ
AT3G07560	Bra040014	8e-46	Ⅴ
	Bra029657	5e-33	Ⅴ
	Bra001257	4e-36	Ⅴ
AT2G04170	-		Ⅴ
AT2G04190	-		Ⅴ
AT3G16760	-		Ⅴ

## Sheet: Table S5
Table S5 FPKM values of BrGRP genes in five different tissues of Chinese cabbage
Gene_ID	Root_FPKM	Stem_FPKM	Leaf_FPKM	Flower_FPKM	Silique_FPKM	Callus_FPKM
Bra031784	0.58029	177.588	532.145	40.7659	0.932247	0
Bra011196	103.103	10.0438	35.4196	8.03132	0	19.4553
Bra035778	10.7698	10.3009	3.02253	32.9758	23.4336	1.73613
Bra021807	1.08062	34.7671	70.381	39.031	1.8367	2.80306
Bra024074	26.077	15.1642	21.4694	1.68585	0	13.4993
Bra022895	0.110005	13.1056	12.3679	9.00517	17.0525	5.44246
Bra027092	4.32017	11.0027	6.73181	1.40435	13.8284	1.1403
Bra021675	164.843	0.37605	5.0113	3.5251	0.821309	10.9095
Bra020903	255.103	230.086	75.7563	97.0631	17.0152	42.1146
Bra015834	1.33344	0.522621	1.38466	0.654871	0	0
Bra013175	0	0.288774	0.250642	0	0	106.974
Bra013176	68.9681	3231.38	1272.78	180.556	6.82151	994.013
Bra040764	49.8134	982.169	1217.88	482.076	3.83192	2568.51
Bra038769	195.069	345.725	139.852	25.8889	64.354	13.3279
Bra040817	231.888	196.289	1173.24	106.405	0	101.668
Bra038559	0	0	0	596.516	4.94765	1.55855
Bra038836	0	0	0	80.7816	0.881233	0
Bra008205	1.32034	0.756307	2.00718	0.291027	0	0
Bra005944	0	0	0	0	0	0
Bra005943	0	0	0	0	0	0
Bra005945	0	0	0	0	0	0
Bra028692	0	0	0	0	0	0
Bra028693	0.0075518	0	0	0	0	0.0183762
Bra028691	0	0	0	0	0	0
Bra028695	0	0	0	0	0	0
Bra009255	0	0.470921	0	0	90.306	0
Bra009253	0	0	0	0	0	0
Bra009254	0.235247	0.196697	0.104096	0	10.1783	0
Bra009251	0	0	0	0	0	0
Bra011869	1378.97	1196.8	1003.95	149.638	252.108	355.955
Bra010693	1301.51	1290.98	1042.14	335.115	492.876	259.816
Bra037056	95.5596	106.148	92.2141	47.0135	78.5918	32.4862
Bra025674	7.83235	11.3004	5.36423	1.95741	4.95096	5.51818
Bra008142	14.8328	25.3728	7.60231	12.8886	16.3515	14.213
Bra008020	0	0	0	0.226964	0	0
Bra035944	25.2976	48.7783	13.3672	10.2948	7.74599	1.60681
Bra005433	0	0	0	0	0	0
Bra015926	35.1024	43.7079	27.6519	42.8847	44.3206	45.7606
Bra031210	2401.77	3722.61	3202.39	311.728	1527.1	421.294
Bra030284	542.677	2025.5	1557.43	163.448	462.532	79.3064
Bra013997	0.195626	0	0.201306	0	0.550107	0
Bra012986	33.0655	49.7427	21.122	9.09486	14.0362	6.21645
Bra014000	0.412427	0.512334	0.600135	0	0	0
Bra001972	28.1917	13.9592	7.20485	54.9342	50.2012	40.6476
Bra005798	56.6004	66.9448	30.1845	28.2725	27.5712	18.1315
Bra027145	0	0	0	0	0	0
Bra032933	50.3858	96.2752	56.8889	31.6488	40.2985	17.2239
Bra025205	76.6243	91.4749	63.8933	40.6937	34.5437	49.2779
Bra031159	59.4227	59.012	11.4215	68.3331	30.318	199.428
Bra010944	16.3605	28.8378	17.772	1.50302	4.91382	4.90918
Bra017742	18.1301	24.3892	12.009	2.49068	2.81673	12.1403
Bra030325	38.1027	25.2884	3.35945	38.6769	18.629	160.259
Bra011655	47.0914	73.3888	32.6428	8.13296	18.9566	16.0227
Bra039380	16.8285	18.3938	7.98534	21.2716	19.3361	11.4129
Bra010757	87.7083	138.451	70.9302	43.6979	51.1646	44.6249
Bra021850	35.8441	45.1936	17.2695	15.7506	13.5664	24.7003
Bra005496	42.3678	75.3688	36.4188	25.3651	24.6999	27.9023
Bra022938	50.8603	76.3343	29.578	28.0045	33.3261	45.26
Bra025568	34.2599	59.2775	37.7356	28.3707	31.2956	18.0431
Bra037177	0.988425	0	22.2175	36.0395	4.45154	0
Bra031809	0	0	0	0	0	0
Bra029657	17.4902	18.881	11.7785	21.955	7.08565	23.7483
Bra040014	0.097663	0	0	0	0.279547	0
Bra001257	22.4419	23.9971	13.3988	23.7981	17.812	38.4914

## Sheet: Table S6
Table S6 Expression values of BrGRP genes at different development stages of Chinese cabbage
Gene ID	RL-RPKM	FL-RPKM
Bra031784	697.239	292.723
Bra022895	38.0543	12.0642
Bra020903	50.779	22.3751
Bra013176	3074.22	1164.79
Bra038769	96.3024	25.7404
Bra008205	17.0845	7.39319
Bra035944	30.2934	13.9258
Bra030284	19.7691	42.1635
Bra014000	11.7983	1.57452
Bra011655	41.3959	18.6248

## Sheet: Table S7
Table S7 Expression values of BrGRP genes under 45°C heat treatment in Chinese cabbage
Gene ID	0h	0.5h	1h	2h	3h	4h
Bra011869	36619.4	31180.1	29162.4	31971.9	28117.9	30162.5
Bra010693	26451.8	24003.4	25984.9	27448.4	24042.3	24705.6
Bra027092	279.829	331.359	236.87	348.146	350.192	201.958
Bra031159	14157.6	11182.3	9919.33	10072.3	8959.41	7757.51
Bra021675	669.206	1316.2	1415.7	1301.77	1360.05	1328.54
Bra037056	12974	18942.7	24003.8	23667.7	22358.4	23282.5
Bra037177	12233.8	15759.4	18001.2	20502.9	22994.3	29254.3
Bra005944	25.4735	28.7466	15.5099	21.7356	19.4577	19.4695
Bra025674	763.172	851.663	1281.23	965.636	962.924	1039.21
Bra020903	1978.36	854.164	611.454	632.452	460.562	400.359
Bra005943	274.442	172.46	220.293	187.609	143.685	170.848
Bra005945	47.0775	101.248	125.024	89.3071	138.416	88.2912
Bra028692	59.1896	86.4946	71.5774	102.56	75.0219	37.0121
Bra028693	104.982	73.0532	68.3652	67.1294	51.2617	20.7899
Bra031784	13072.7	9342.27	9144.86	12886.8	9917.2	10515.3
Bra028691	591.479	885.404	1478.64	1469.93	1264.87	1550.68
Bra010944	8255.25	5943.08	6484.89	6095.45	6231.32	5295.27
Bra008142	2806.51	4130.28	4258.57	3704.66	3753.99	3300.99
Bra028695	62.8814	39.68	51.2142	71.4206	38.5064	32.3256
Bra008020	101.402	133.442	138.741	242.634	193.369	171.628
Bra015834	168.881	243.903	312.951	252.548	241.953	361.362
Bra035944	1115.86	990.619	1377.42	1174.35	789.554	851.256
Bra013175	2599.7	1506.55	1982.98	1628.86	1376.45	602.988
Bra013176	38263.2	35321.5	37106.4	40892.2	38302	38116.1
Bra011196	10040.5	4883.72	6086.52	5796.22	4185.33	4948.37
Bra040764	28564	27973.7	33217.5	30319.7	32060.9	29150.2
Bra005433	534.451	659.126	569.428	591.603	444.434	430.109
Bra005798	4975.77	5772.23	5730.47	5496.4	6465.22	5031.03
Bra039380	4592.12	3243.28	3772.51	3492.46	3501.7	2794.29
Bra035778	398.878	205.813	314.159	377.357	391.387	397.439
Bra015926	10281.8	10122.2	11973.3	10143.7	9618.84	7917.18
Bra031210	27185.3	26815.8	22021	23399.4	19730.2	22250.5
Bra010757	7383.07	7720.54	6916.44	8289.27	7112.33	7317.14
Bra021807	24503.4	18259.1	16942.3	19921.2	16006.8	19970
Bra030284	11169.7	15074	15190.5	16448.2	13927.8	14512.9
Bra017742	8178.2	7469.78	8147.92	8259.9	7646.85	7608.23
Bra038769	611.62	634.942	501.509	398.686	421.451	449.497
Bra030325	8599.14	8405.03	7237.84	7355.13	5941.65	5748.69
Bra031809	9540.97	10580.2	13430.6	14171.2	12950.5	15558.4
Bra021850	3446.15	2816.71	2505.57	2806.31	2833.84	2581.06
Bra029657	10440.3	12706.6	13527.7	14982.2	14323.6	14383.1
Bra040014	2351.97	4051.34	4693.57	4080.91	4783.5	4538.96
Bra040817	5746.01	5131.85	5816.65	5331.8	5321.65	5515.57
Bra005496	9778.68	8147.54	8115.58	10221.2	9144.86	9726.26
Bra024074	7649.09	8037.14	9932.54	9240.17	7630.84	7739.23
Bra009255	183.568	183.229	301.884	279.288	246.222	240.445
Bra027145	234.599	260.349	438.016	279.905	357.016	441.091
Bra009253	36.3708	80.0168	58.3011	42.7848	41.7852	59.7374
Bra009254	170.902	210.61	325.007	218.576	235.398	244.333
Bra009251	197.122	258.361	366.84	331.997	310.892	286.108
Bra013997	9063.5	13129.5	13178.2	13709.6	11138.7	11986.1
Bra038559	22.4825	23.6676	32.1788	28.9138	25.3088	30.0755
Bra012986	845.849	898.476	806.757	801.682	883.812	908.461
Bra032933	5151.62	3646.41	3583.69	3813.89	3702.52	3293.25
Bra011655	24623.6	19501.3	18738.4	18839	18049.8	16957
Bra038836	27.8142	22.6107	27.009	28.243	61.6379	28.7256
Bra022895	8383.82	9477.18	13728.3	12545.6	10071	13285.7
Bra014000	10050.3	10073.1	14664.2	12496.1	9914.3	12389.2
Bra022938	7811.8	9744.45	8538.47	10435.7	9957.75	9638.46
Bra025205	4970.65	3721.35	3679.18	3388.83	3956.25	3447.47
Bra025568	2770.79	2623.02	3404.28	2700.26	2826.68	2371.57
Bra008205	49.5173	60.4871	120.332	144.064	98.7281	150.681
Bra001972	1275.72	2024.6	1975.34	1969.8	2326.34	1907.57
Bra001257	12442.2	15815.6	16382.4	14434.1	16701.1	14151.2

## Sheet: Table S8
Table S8 Expression profiles of BrGRP genes under 45°C heat treatment in Chinese cabbage
Gene ID	Profile	ck	0.5h	1h	2h	3h	4h
Bra025205	0	0	-2.07	-2.15	-2.74	-1.63	-2.62
Bra021850	0	0	-1.81	-2.86	-1.84	-1.76	-2.59
Bra010944	0	0	-2.23	-1.64	-2.06	-1.91	-3.01
Bra011869	1	0	-1.74	-2.46	-1.47	-2.86	-2.1
Bra032933	1	0	-2.24	-2.36	-1.95	-2.14	-2.9
Bra011196	1	0	-2.37	-1.64	-1.8	-2.87	-2.32
Bra031784	1	0	-2.13	-2.27	-0.09	-1.76	-1.38
Bra035778	2	0	-2.54	-0.92	-0.21	-0.07	-0.01
Bra013176	5	0	-1.68	-0.64	1.39	0.02	-0.08
Bra010693	5	0	-1.76	-0.32	0.67	-1.73	-1.24
Bra028695	5	0	-1.49	-0.67	0.42	-1.59	-2.16
Bra040817	6	0	-2.33	0.25	-1.54	-1.58	-0.84
Bra011655	8	0	-1.82	-2.13	-2.09	-2.42	-2.91
Bra030325	8	0	-0.14	-1.02	-0.92	-2.19	-2.38
Bra031159	8	0	-1.16	-1.74	-1.67	-2.24	-2.95
Bra028693	8	0	-0.67	-0.79	-0.82	-1.31	-2.94
Bra020903	8	0	-1.47	-2.05	-1.99	-2.55	-2.79
Bra021807	10	0	-1.95	-2.45	-1.37	-2.83	-1.36
Bra031210	10	0	-0.11	-1.7	-1.21	-2.59	-1.62
Bra005496	11	0	-1.86	-1.9	0.45	-0.68	-0.05
Bra017742	15	0	-2.06	-0.08	0.23	-1.52	-1.64
Bra005943	15	0	-2.05	-0.97	-1.68	-2.86	-2.1
Bra035944	15	0	-0.57	1.01	0.25	-1.66	-1.3
Bra039380	16	0	-2.11	-1.19	-1.66	-1.65	-3.02
Bra015926	16	0	-0.12	1.14	-0.1	-0.5	-1.95
Bra013175	16	0	-1.1	-0.55	-0.95	-1.29	-2.95
Bra038559	17	0	0.36	2.51	1.76	0.83	2.03
Bra009255	18	0	-0.01	2.38	2.01	1.41	1.29
Bra005944	19	0	0.56	-2.26	-0.73	-1.23	-1.23
Bra038836	22	0	-0.58	-0.08	0.04	2.27	0.09
Bra008020	24	0	0.89	1.02	2.83	2.1	1.71
Bra027145	27	0	0.38	2.3	0.65	1.55	2.32
Bra014000	29	0	0.01	2.35	1.35	-0.08	1.3
Bra040764	30	0	-0.31	2.23	0.88	1.71	0.3
Bra025568	30	0	-0.46	1.73	-0.22	0.17	-1.31
Bra009254	30	0	0.99	3.05	1.17	1.52	1.69
Bra024074	31	0	0.44	2.32	1.68	-0.02	0.1
Bra025674	31	0	0.62	2.93	1.33	1.31	1.74
Bra038769	32	0	0.19	-1.02	-2.2	-1.92	-1.58
Bra027092	34	0	0.74	-0.73	0.96	0.99	-1.43
Bra012986	37	0	1.11	-0.87	-0.98	0.81	1.31
Bra010757	38	0	0.69	-1.01	1.8	-0.58	-0.14
Bra037177	39	0	0.83	1.27	1.7	2.08	2.87
Bra031809	39	0	0.56	1.85	2.14	1.65	2.65
Bra028692	40	0	1.07	0.54	1.56	0.67	-1.32
Bra005433	40	0	1.26	0.38	0.61	-1.1	-1.3
Bra005798	43	0	1.52	1.45	1.02	2.69	0.11
Bra022938	44	0	2.03	0.82	2.66	2.23	1.93
Bra009253	46	0	2.69	1.6	0.55	0.47	1.69
Bra015834	46	0	1.41	2.37	1.55	1.38	2.93
Bra040014	47	0	2.04	2.59	2.07	2.66	2.46
Bra001257	47	0	2.16	2.48	1.34	2.65	1.16
Bra005945	47	0	2.01	2.57	1.68	2.84	1.65
Bra021675	47	0	2.36	2.62	2.32	2.48	2.4
Bra001972	47	0	2.28	2.15	2.14	2.96	1.98
Bra008142	48	0	2.51	2.7	1.8	1.89	1.05
Bra037056	49	0	1.59	2.58	2.52	2.28	2.45
Bra030284	49	0	2.26	2.32	2.92	1.66	1.97
Bra029657	49	0	1.49	1.97	2.74	2.4	2.43
Bra022895	49	0	0.6	2.43	1.99	0.9	2.27
Bra013997	49	0	2.41	2.43	2.69	1.34	1.81
Bra008205	49	0	0.43	1.92	2.31	1.49	2.4
Bra009251	49	0	1.23	2.83	2.38	2.08	1.7
Bra028691	49	0	1.05	2.39	2.38	1.99	2.52

## Sheet: Table S9
Table S9 Expression values of BrGRP genes under low temperature treatment in Chinese cabbage
GeneID	head (25℃)	non-head (4℃)	Gene expression difference
Bra011869	9.44278	5.80326	down-regulated
Bra010693	9.08535	7.44978	down-regulated
Bra027092	0.490064	0.567688
Bra031159	5.1275	4.36241
Bra037056	4.09082	4.78174
Bra037177	4.83781	9.47434	up-regulated
Bra025674	3.18383	2.77407
Bra020903	4.02854	5.45221	up-regulated
Bra005943	-2.5103	-6.64386	down-regulated
Bra028692	-6.64386	-2.79068	up-regulated
Bra028693	-6.64386	-5.13505	up-regulated
Bra031784	6.0347	6.08361
Bra010944	2.34816	2.76047
Bra008142	2.68636	4.04706	up-regulated
Bra008020	-2.19068	-2.82476
Bra015834	-0.37826	1.16416	up-regulated
Bra035944	0.818085	1.73684
Bra013175	9.90651	1.47664	down-regulated
Bra013176	12.0054	11.2483
Bra011196	4.93949	6.52237	up-regulated
Bra040764	7.07551	9.14579	up-regulated
Bra005798	3.8937	4.90957	up-regulated
Bra039380	3.7409	4.55396
Bra035778	1.55409	2.63662	up-regulated
Bra015926	5.66324	6.32272
Bra031210	11.2721	10.1227	down-regulated
Bra010757	4.9744	5.83473
Bra021807	6.34727	6.55572
Bra030284	10.0546	6.04645	down-regulated
Bra017742	4.2257	3.76593
Bra038769	5.15253	3.77809	down-regulated
Bra030325	3.69046	1.75705	down-regulated
Bra031809	-2.66218	0.949043	up-regulated
Bra021850	3.94766	3.76874
Bra029657	4.50108	4.44093
Bra040014	-2.92148	-3.01755
Bra040817	3.62413	10.4253	up-regulated
Bra005496	4.37404	4.78981
Bra024074	3.64914	5.66742	up-regulated
Bra009254	-2.70133	-0.383113	up-regulated
Bra013997	2.02489	2.91136
Bra012986	3.86154	5.03111	up-regulated
Bra032933	4.22489	4.92266
Bra011655	4.27564	4.05183
Bra022895	3.42259	1.62295	down-regulated
Bra014000	-2.21573	-2.32186
Bra022938	5.55594	5.51424
Bra025205	4.95425	5.14739
Bra025568	4.94809	5.01119
Bra008205	-1.47674	1.11526	up-regulated
Bra001972	3.89974	5.4426	up-regulated
Bra001257	5.44557	5.2435

## Sheet: Table S10
Table S10 Expression values of BrGRP genes under drought treatment in Chinese cabbage
GeneID	DS_4h_Ctrl	DS_4h_PEG	DS_8h_Ctrl	DS_8h_PEG	DS_12h_Ctrl	DS_12h_PEG	GeneID	DT_4h_Ctrl	DT_4h_PEG	DT_8h_Ctrl	DT_8h_PEG	DT_12h_Ctrl	DT_12h_PEG
Bra011869	3.92428	3.75418	6.39477	0	4.56614	2.82576	Bra011869	4.5996	5.72584	6.87177	2.79076	0	5.57184
Bra010693	4.88579	3.71531	5.09321	4.27029	4.52762	3.78709	Bra010693	4.2392	5.6877	5.94011	3.75166	3.56316	6.27002
Bra031159	1.92415	0	0	0	0	0	Bra031159	1.86267	0	2.75536	0	0	0
Bra037056	0	0	0	0	0	2.99164	Bra037056	3.44272	4.30439	5.33684	0	3.76459	4.1533
Bra037177	2.59467	4.0123	3.06542	0	3.82164	6.25221	Bra037177	2.5329	0	4.42726	2.05059	0	4.24421
Bra025674	0	0	0	0	3.8062	0	Bra025674	0	0	0	0	0	4.22866
Bra020903	0	3.23225	3.28281	0	5.03888	0	Bra020903	0	0	0	0	0	0
Bra031784	0	0	3.74625	0	4.50169	0	Bra031784	0	4.06484	5.10859	3.74725	0	0
Bra008142	2.39876	0	1.86846	0	2.62503	1.88182	Bra008142	0	1.20672	3.22925	1.83908	0	0
Bra035944	0	0	1.87526	0	0	1.88863	Bra035944	0	0	3.23605	0	0	0
Bra013176	6.86702	6.87309	9.42543	7.24657	8.67894	8.52584	Bra013176	5.97511	7.05508	8.45491	5.13599	6.92987	8.10351
Bra011196	0	0	0	0	0	2.79986	Bra011196	0	0	0	0	0	0
Bra040764	0	0	0	0	0	0	Bra040764	9.41657	11.1116	10.7897	10.0857	9.69291	11.8198
Bra005798	2.13907	0	4.19359	3.11427	3.95021	3.20649	Bra005798	2.66277	2.94818	1.96928	2.57741	1.40939	4.36529
Bra039380	0	0	2.907	1.24368	0	2.33451	Bra039380	3.37636	0.662771	1.68258	1.8741	0	0
Bra015926	1.26308	3.25535	3.7327	0	3.4893	4.06774	Bra015926	3.20179	2.65663	3.67839	1.70232	3.11778	2.90477
Bra031210	5.26334	6.26243	6.64064	5.81803	5.81203	6.44986	Bra031210	4.20173	4.38751	7.48751	5.17302	5.11101	6.71768
Bra010757	0	2.16799	3.554	0	2.98874	2.24443	Bra010757	0	0.573132	4.17754	0.198708	1.03448	4.40282
Bra021807	2.776	3.18621	3.83092	0	5.00246	5.06752	Bra021807	0	0	4.60699	0	3.6277	4.41995
Bra030284	4.26334	2.67746	4.73374	0	0	2.74942	Bra030284	2.20173	4.06559	5.90254	4.29855	3.52604	0
Bra017742	1.40555	0	0	0	2.63183	0	Bra017742	0	0	0	0	2.67456	0
Bra038769	0	0	0	0	0	0	Bra038769	2.71447	0	0	0	3.03305	0
Bra030325	0	0	0	3.25398	0	0	Bra030325	0	0	2.69792	0	0	0
Bra021850	0	0	0	0	0	0	Bra021850	0	0	1.65955	0	2.10117	0
Bra029657	0	0	0	0	2.46483	0	Bra029657	2.17734	3.36924	3.06894	3.67768	3.50848	2.88022
Bra040817	0	0	0	0	0	0	Bra040817	0	0	3.79694	2.42771	0	4.61601
Bra005496	0	0	0	0	0	1.27087	Bra005496	1.72788	0.599442	2.61899	0.22525	2.06079	2.42928
Bra024074	0	0	0	0	0	0	Bra024074	0	0	0	0	2.64039	0
Bra013997	3.57924	0	5.5094	2.96154	4.80621	3.06678	Bra013997	4.32483	5.37839	6.93535	3.61982	5.00844	5.55059
Bra012986	0	0	0	0	0	1.62721	Bra012986	1.08348	0.953824	2.97496	0	0	2.78601
Bra032933	0	1.95733	3.01834	1.93725	2.77488	2.032	Bra032933	1.48718	0	0	0	1.81673	0
Bra011655	2.26926	3.26155	1.73889	1.65906	0	0	Bra011655	0	3.07782	0	0.708549	0	2.91097
Bra022895	0	0	0	0	0	0	Bra022895	0	0	0	0	0	3.43775
Bra014000	2.71569	0	4.64503	2.10364	3.94211	2.19965	Bra014000	3.46163	4.52194	6.07014	2.74393	5.07029	5.52925
Bra022938	2.65358	0	0	1.04514	3.46456	3.45708	Bra022938	0.592397	2.46435	3.06836	1.08904	2.51071	2.29344
Bra025205	1.63368	3.04297	3.68849	0	0	3.11739	Bra025205	1.57229	1.4404	0	0	2.90135	0
Bra025568	2.50687	1.58867	1.65416	2.16239	2.41087	0	Bra025568	2.12382	1.99687	1.01448	1.94035	1.45839	1.82385
Bra001972	0	0	2.78401	0	0	0	Bra001972	0	0	0	1.76458	0	0
Bra001257	2.15043	1.55722	4.78992	2.54063	2.37661	3.63291	Bra001257	0	1.9595	2.98066	0.588843	2.4207	2.79172

[truncated: 5 more sheets: Table S11 , Table S12, Table S13, Table S14, Table S15]
